# Supplementary material
Source: PubMed Central journal article supplement (PMC5962349)

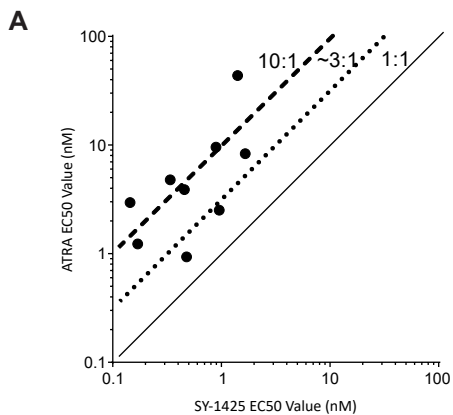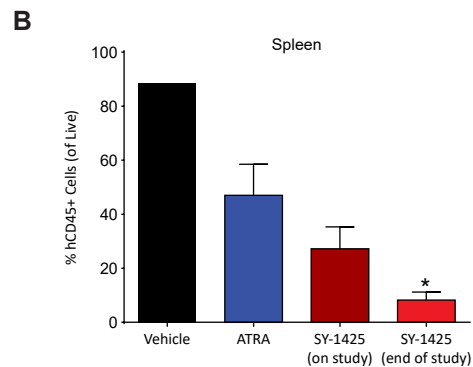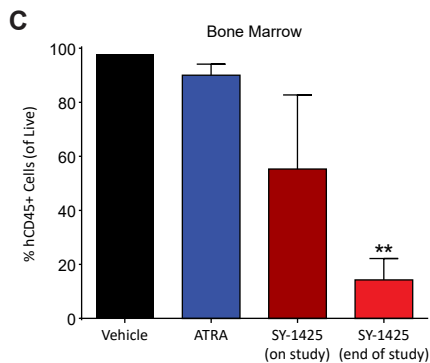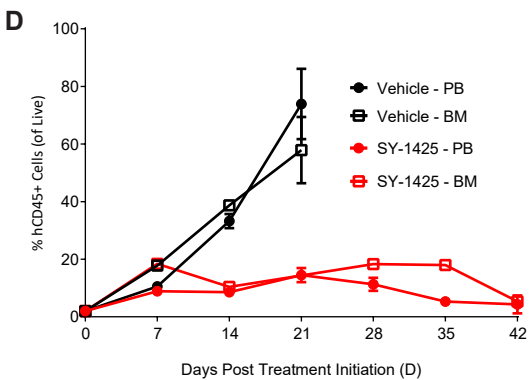

Supplement: NIHMS965851-supplement-10.pdf [file NIHMS965851-supplement-10.pdf]

**A**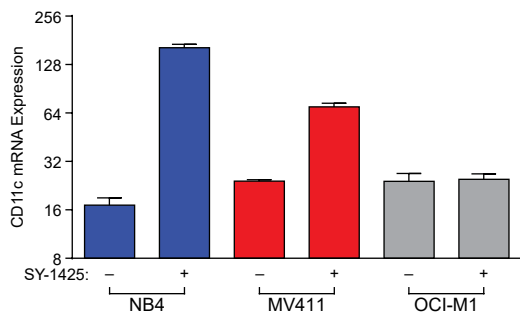**B**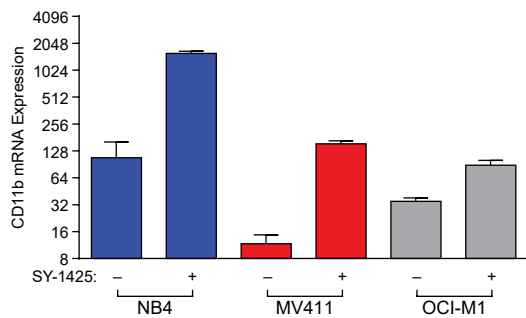**C**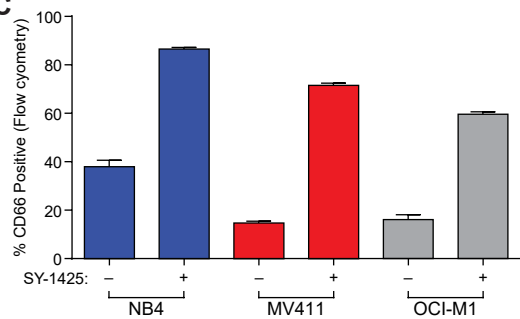**D**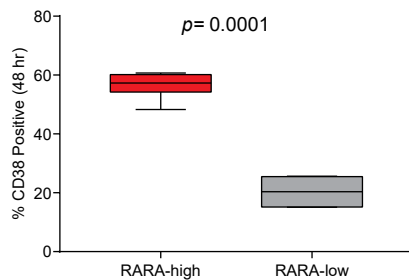

Supplement: NIHMS965851-supplement-11.pdf [file NIHMS965851-supplement-11.pdf]

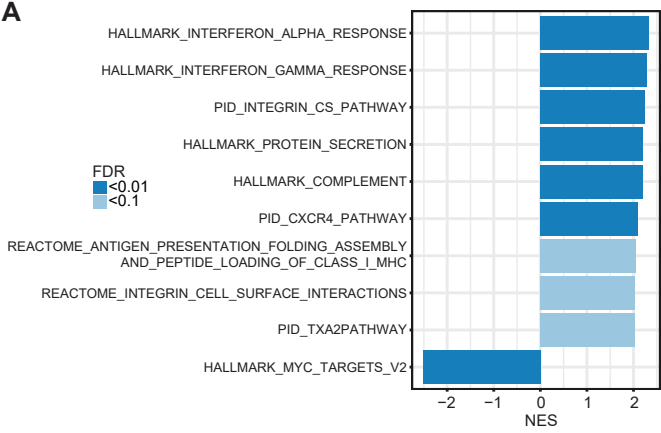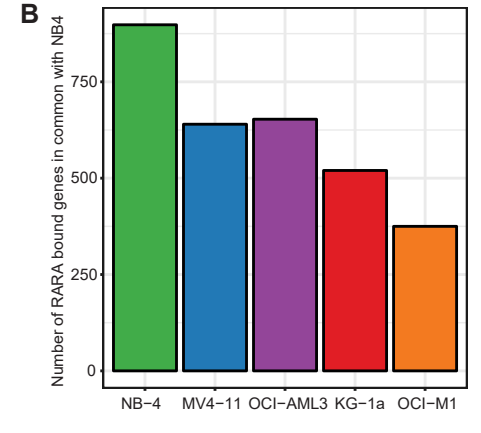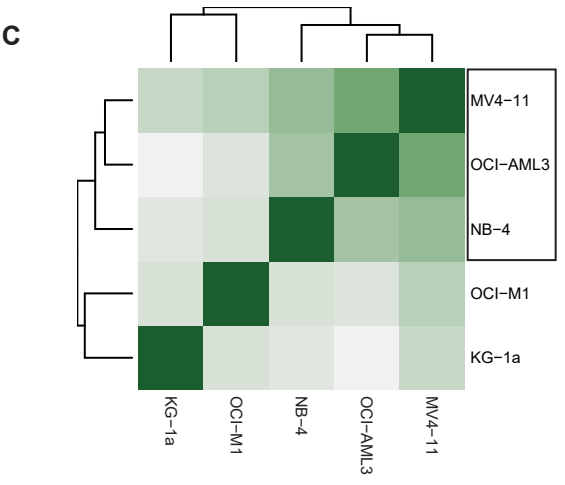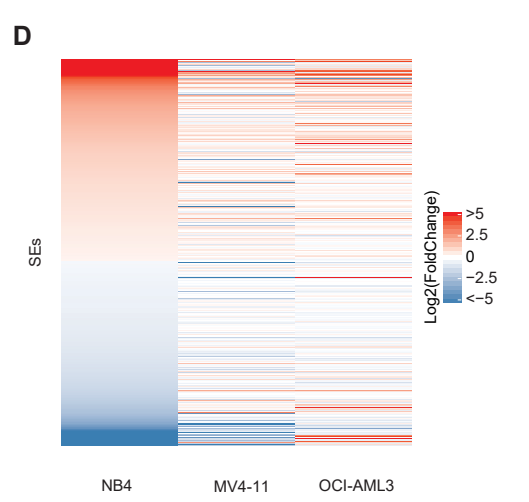

Supplementary Figure 12

Supplement: NIHMS965851-supplement-12.pdf [file NIHMS965851-supplement-12.pdf]

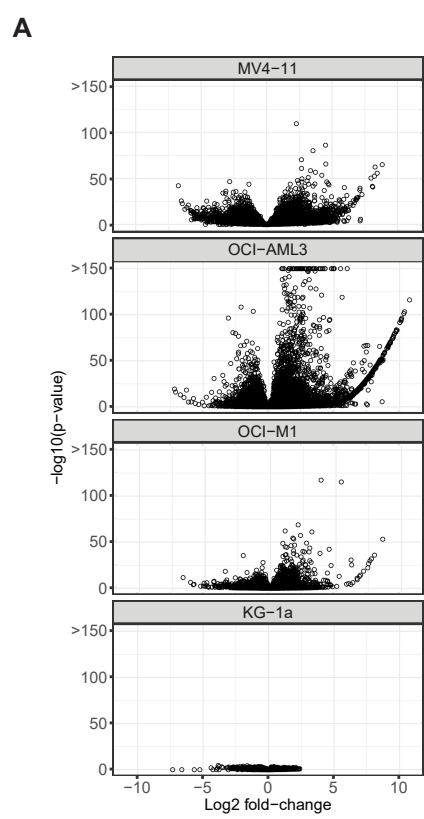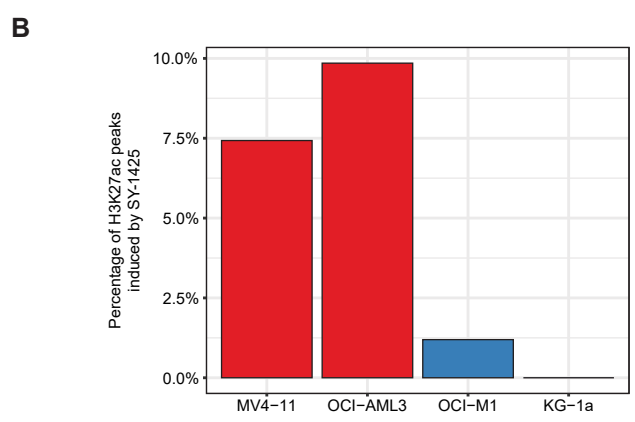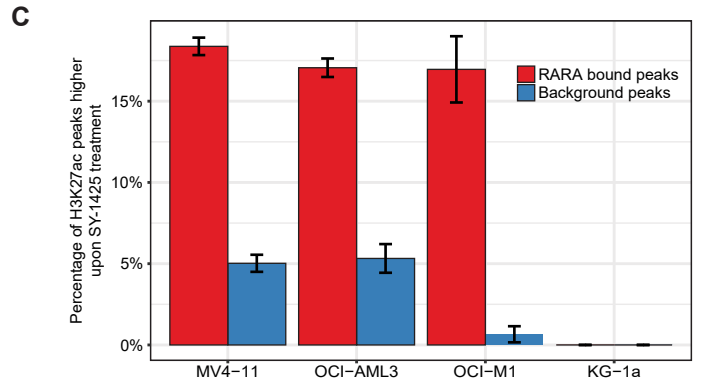

Supplement: NIHMS965851-supplement-13.pdf [file NIHMS965851-supplement-13.pdf]
